# Supplementary material for: Lifestyle and Risk of Screening‐Detected Abdominal Aortic Aneurysm in Men
Source: PubMed Central journal article supplement — J Am Heart Assoc. 2017 May 10;6(5):e004725. doi: 10.1161/JAHA.116.004725 (PMC5524061; doi:10.1161/jaha.116.004725), 2017-05-10
Supplement: JAH3-6-e004725-s001.pdf [file JAH3-6-e004725-s001.pdf]

## SUPPLEMENTARY FILES

**eTable 1.** Comparison of the original Cohort of Swedish Men (COSM), and men in the COSM screened for abdominal aortic aneurysm between 65 and 75 years of age, with the Swedish population in 1997 for men aged 45-74 years, regarding age distribution, educational level, body mass index, and current smoking.

| Characteristics                                                   | Original<br>COSM 1997 | Analytical<br>COSM 1997* | Population 1997 † |
|-------------------------------------------------------------------|-----------------------|--------------------------|-------------------|
| <b>Age groups, 45-79 years</b>                                    |                       |                          |                   |
| Total, n                                                          | 45 906                | 14 249                   | 1 594 952         |
| 45-49                                                             | 15.9                  | 7.6                      | 19.5              |
| 50-54                                                             | 18.8                  | 45.1                     | 20.8              |
| 55-59                                                             | 15.9                  | 33.3                     | 15.6              |
| 60-64                                                             | 13.1                  | 11.4                     | 12.5              |
| 65-69                                                             | 14.1                  | 2.6                      | 11.6              |
| 70-74                                                             | 12.4                  | -                        | 10.8              |
| 75-79                                                             | 9.9                   | -                        | 9.2               |
| <b>Education, ages 45-74 years</b>                                |                       |                          |                   |
| Total, n                                                          | 41 382                | 14 249                   | 1 448 585         |
| ≤12 years                                                         | 82.3                  | 80.4                     | 77.1              |
| >12 years                                                         | 17.3                  | 19.4                     | 21.0              |
| <b>Body Mass Index (&gt;25 kg/m<sup>2</sup>), by age groups ‡</b> |                       |                          |                   |
| 45-54                                                             | 54.5                  | 56.4                     | 57.2              |
| 55-64                                                             | 59.1                  | 58.6                     | 60.3              |
| 65-74                                                             | 56.8                  | 63.2                     | 57.0              |
| <b>Current smokers, by age groups §</b>                           |                       |                          |                   |
| 45-54                                                             | 27.7                  | 24.2                     | 23.2              |
| 55-64                                                             | 23.7                  | 20.2                     | 22.8              |
| 65-74                                                             | 22.4                  | 16.1                     | 17.2              |

COSM indicates the Cohort of Swedish Men. All values are percentages unless otherwise indicated and may not add up due to missing values.

\*) Analytical cohorts included participants of the COSM 1997 that were screened for AAA between 65 and 75 years of age, and excluded those with history of abdominal aortic aneurysm; or with implausible energy intake.

†) Data available from Official Statistics Sweden (OSS)

‡) Proportion of overweight (Body Mass Index >25 kg/m<sup>2</sup>) people within each age-group.

§) Proportion of current smokers within each age-group reported for the cohorts, while corresponding proportion of daily smokers are reported for the population.

eFigure 1.

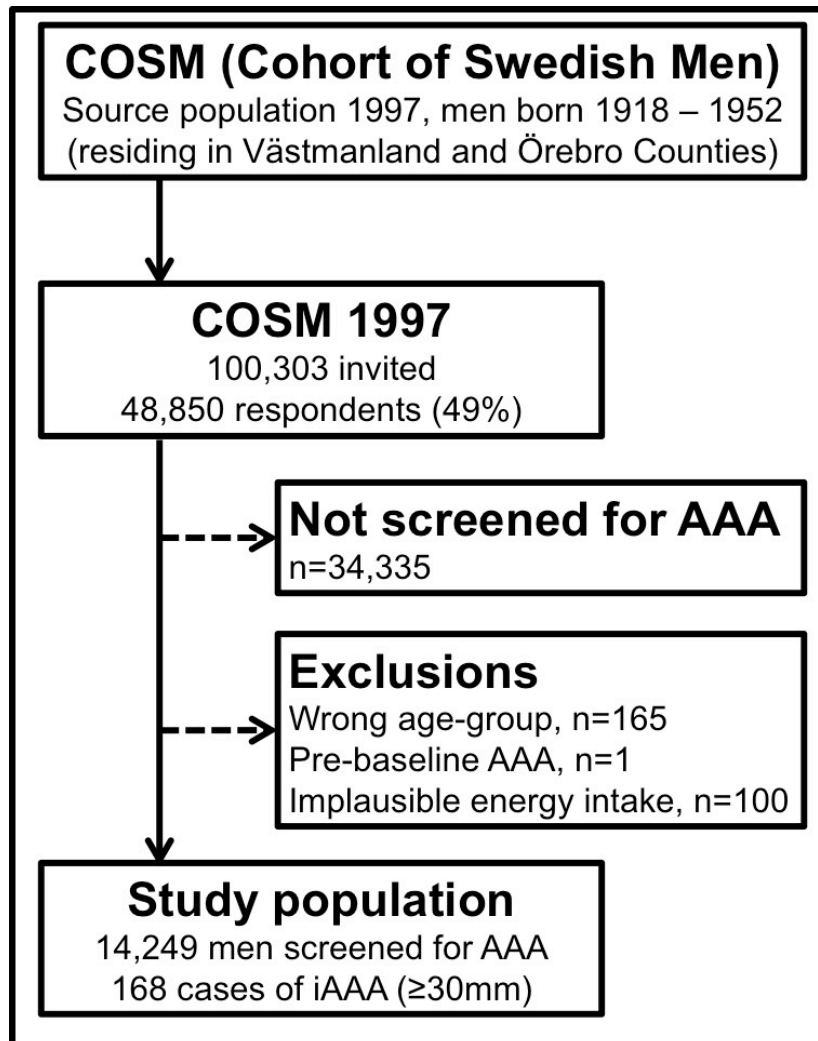

Source population, exclusions, and study population
